# Supplementary material
Source: PubMed Central journal article supplement (PMC3251074)
Supplement: 1105500108_pnas.201105500SI.pdf [file 1105500108_pnas.201105500SI.pdf]

# Supporting Information

Ferrer et al. 10.1073/pnas.1105500108

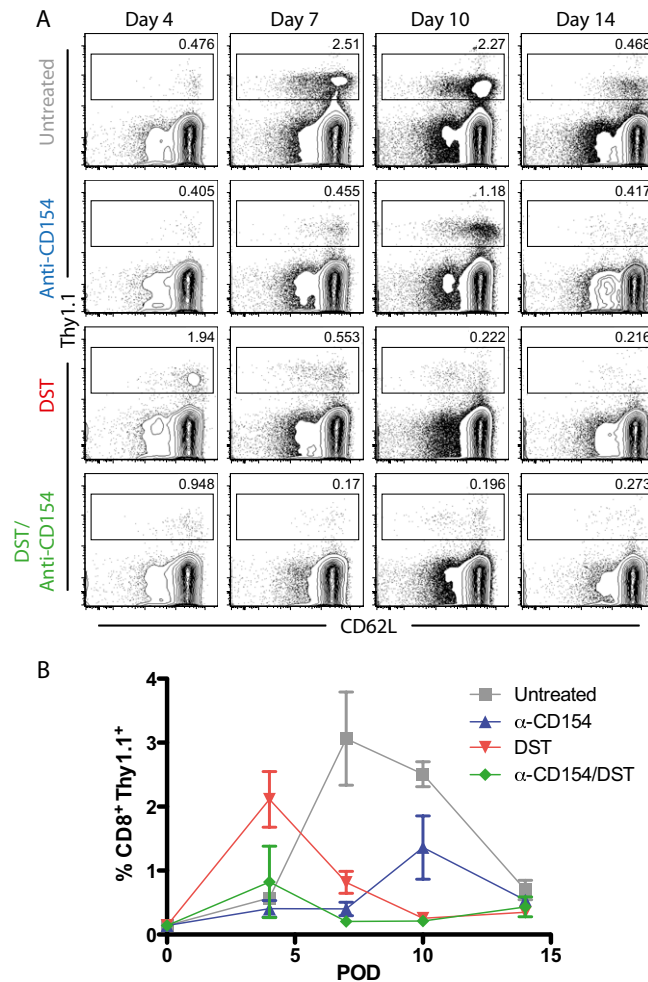

**Fig. S1.** CD154 blockade delays antigen-specific CD8<sup>+</sup> T-cell expansion in draining lymph nodes. Mice were treated as described in Fig. 1 and killed at the indicated time points. (A) We observed expansion and contraction of the donor-reactive CD8<sup>+</sup> T cells in the draining node with peaks spanning days 7 through 10 ( $3.06\% \pm 0.73\%$  and  $2.51\% \pm 0.19\%$ ). Treatment with donor-specific transfusion led to an early expansion of the donor reactive CD8<sup>+</sup> T cells, peaking at day 4, compared with untreated controls ( $2.11\% \pm 0.44\%$  vs.  $0.57\% \pm 0.09\%$ ;  $P = 0.026$ ). Treatment with anti-CD154 monotherapy delayed expansion of OT-I T cells with a peak at day 10, at which point the magnitude of the response was similar to untreated controls ( $1.36\% \pm 0.49\%$  vs.  $2.51\% \pm 0.19\%$ ;  $P = 0.098$ ). Combined treatment with donor-specific transfusion and anti-CD154 led to minimal expansion of donor-reactive CD8<sup>+</sup> T cells over background at day 4 ( $0.82\% \pm 0.56\%$  vs.  $0.14\% \pm 0.02\%$ ;  $P = 0.205$ ). (B) Concatenated flow cytometry plots of CD8<sup>+</sup> T cells. The gates shown represent the antigen-specific OT-I T cells in the draining lymph nodes. Data are summarized from three experiments with three mice per group. Values are mean  $\pm$  SEM.
